# Supplementary material
Source: PubMed Central journal article supplement (PMC4919184)

## HEALTHY AORTIC VALVES

*Native  
Valve Interstitial Cell (VIC)*

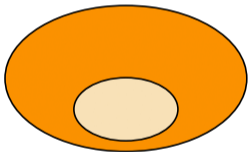

Hyperphosphatemia  
Aging

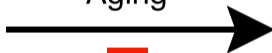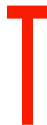

**BMP Receptor  
Inhibition**

*In vitro and In vivo*

## DISEASED AORTIC VALVES

*Calcifying  
Valve Interstitial Cell (VIC)*

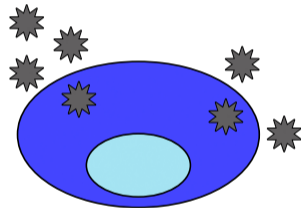

Supplement: NIHMS785263-supplement-Graphic_Abstract.pdf [file NIHMS785263-supplement-Graphic_Abstract.pdf]
